# Supplementary material for: The impact of Ni and Zn doping on the thermal durability and thermoelectric variables of pristine CuSe nanoparticles
Source: Royal Society of Chemistry journal article supplement (doi:10.1039/d3ma00454f), 2023-01-01
Supplement: d3ma00454f1.pdf [file d3ma00454f1.pdf]

## Supporting Information

### The impact of Ni and Zn doping on the thermal durability and thermoelectric variables of pristine CuSe nanoparticles

Sefali R. Patel<sup>1,a\*</sup>, Sunil H. Chaki<sup>1,2,b\*</sup>, Mitesh B. Solanki<sup>3</sup>, Rohitkumar M. Kannaujiya<sup>1</sup>, Zubin R. Parekh<sup>1</sup>, Ankurkumar J. Khimani<sup>4</sup>, Milind P. Deshpande<sup>1</sup>

<sup>1</sup>P. G. Department of Physics, Sardar Patel University, Vallabh Vidyanagar – 388120, Gujarat, India.

<sup>2</sup>Department of Applied & Interdisciplinary Sciences, CISST, Sardar Patel University, Vallabh Vidyanagar – 388120, Gujarat, India.

<sup>3</sup>Department of Physics, Parul Institute of Applied Sciences, Parul University, Waghodia, Vadodara, Gujarat, India- 391760.

<sup>4</sup>Department of Physics, Shri A. N. Patel P. G. Institute of Science and Research, Anand – 388001, Gujarat, India.

\*Corresponding authors: [sefalipatel12345@gmail.com](mailto:sefalipatel12345@gmail.com) (Sefali R. Patel)

[sunilchaki@yahoo.co.in](mailto:sunilchaki@yahoo.co.in) (Sunil H. Chaki)

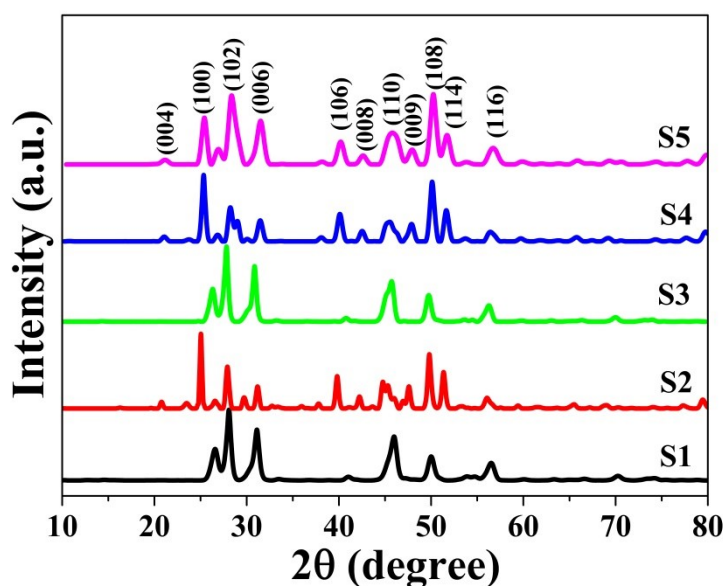

**Figure S1** The XRD patterns for as-synthesized nanoparticles (adapted from S. R. Patel et. al., ACS Applied Biomaterials, 2023, <http://dx.doi.org/10.1021/acsbm.3c00090> )

**Table S1:** The structural data for as-synthesized S1, S2, S3, S4 and S5 nanoparticles (adapted from S. R. Patel et. al., ACS Applied Biomaterials, 2023, <http://dx.doi.org/10.1021/acsabm.3c00090>).

| Sample | Lattice parameters |        | Volume<br>V(Å <sup>3</sup> ) | Crystallite size<br>t (nm) | Micro<br>Strain | Dislocation<br>density δ  |
|--------|--------------------|--------|------------------------------|----------------------------|-----------------|---------------------------|
|        | a (Å)              | c (Å)  |                              |                            |                 |                           |
| S1     | 3.948              | 17.285 | 233.31                       | 11.981 ± 0.108             | 0.002904        | 7.046 × 10 <sup>15</sup>  |
| S2     | 3.942              | 17.258 | 232.24                       | 14.805 ± 0.162             | 0.002426        | 5.015 × 10 <sup>15</sup>  |
| S3     | 3.936              | 17.231 | 231.17                       | 11.658 ± 0.098             | 0.003139        | 8.819 × 10 <sup>15</sup>  |
| S4     | 3.957              | 17.326 | 234.94                       | 11.882 ± 0.112             | 0.002979        | 7.531 × 10 <sup>15</sup>  |
| S5     | 3.966              | 17.366 | 236.55                       | 8.464 ± 0.092              | 0.004237        | 15.581 × 10 <sup>15</sup> |

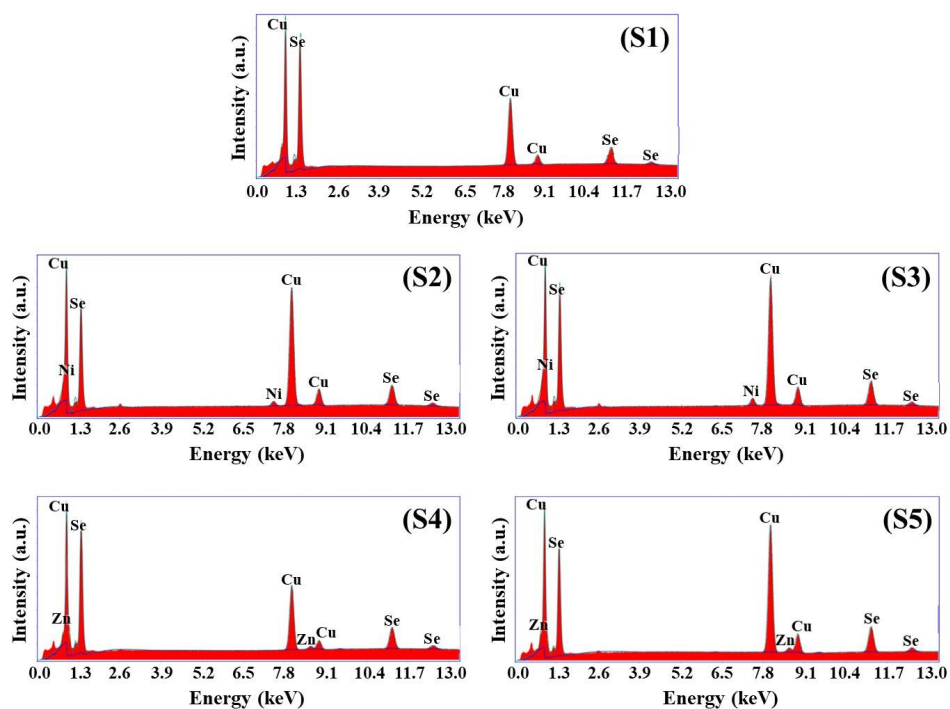

**Figure S2** The EDAX spectra for all five as-synthesized nanoparticles (adapted from S. R. Patel et. al., ACS Applied Biomaterials, 2023, <http://dx.doi.org/10.1021/acsabm.3c00090> ).

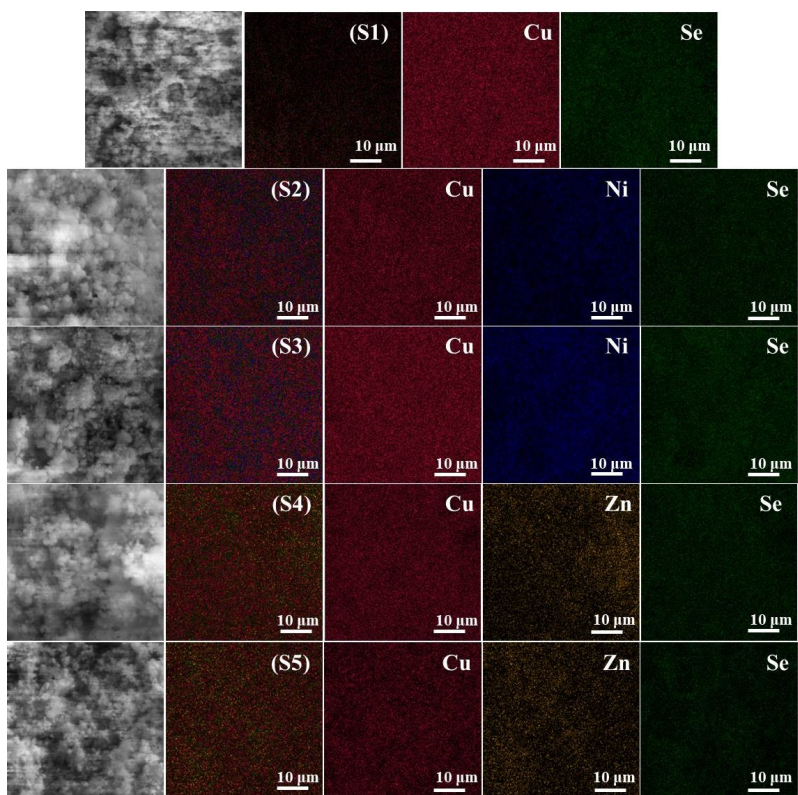

**Figure S3** The EDAX elemental mapping micrographs for S1, S2, S3, S4 and S5 nanoparticles (adapted from S. R. Patel et. al., ACS Applied Biomaterials, 2023, <http://dx.doi.org/10.1021/acsabm.3c00090>).

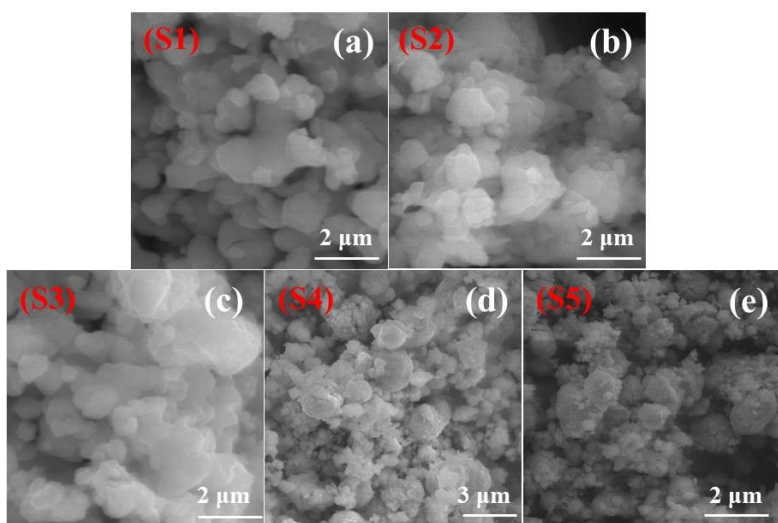

**Figure S4** The FESEM micrographs for S1, S2, S3, S4 and S5 nanoparticles (adapted from S. R. Patel et. al., ACS Applied Biomaterials, 2023, <http://dx.doi.org/10.1021/acsabm.3c00090> ).

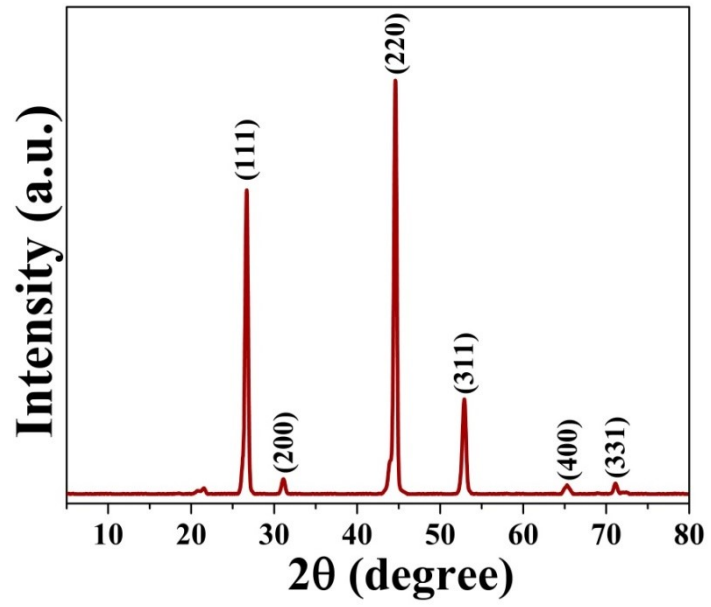

**Figure S5** The XRD pattern of  $\text{Cu}_2\text{Se}$  resulting from the vacuum annealing of pristine CuSe nanoparticles.
